# Supplementary material for: Excitation-wavelength-dependent photoluminescence of a pyromellitic diimidenanowire network
Source: Royal Society of Chemistry journal article supplement (doi:10.1039/b918297g), 2010-01-01

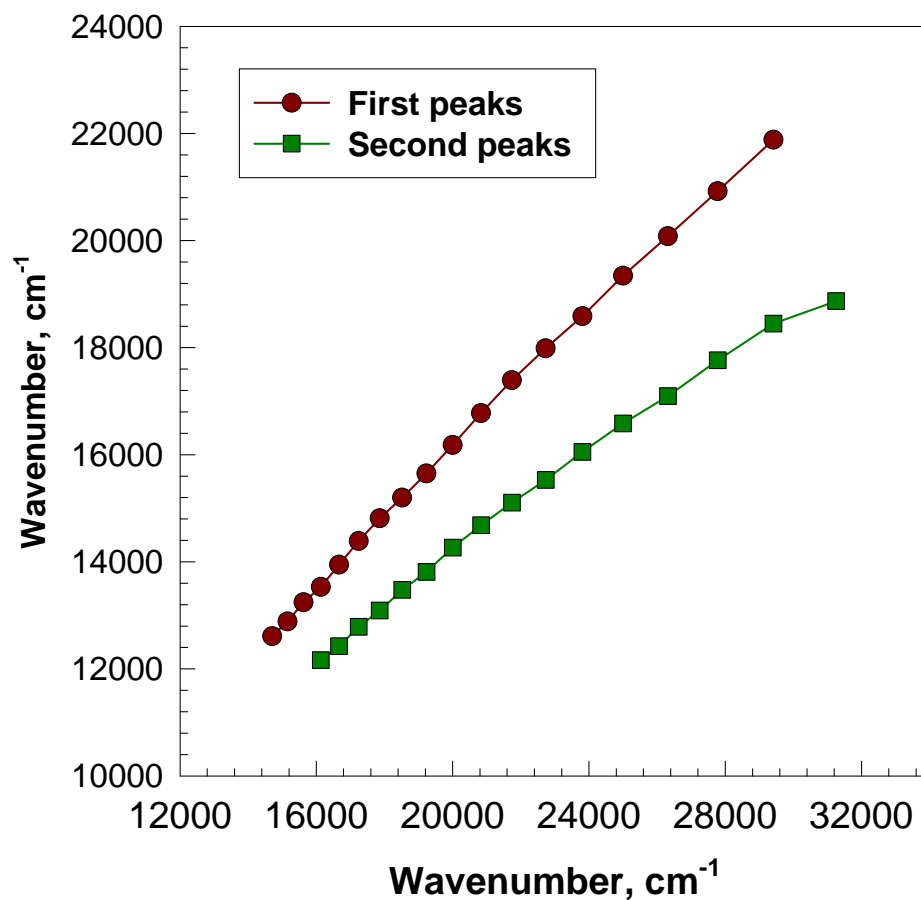

**Figure S1.** Photoluminescence peaks of PMDI nanowires (in the unit of wavenumber).

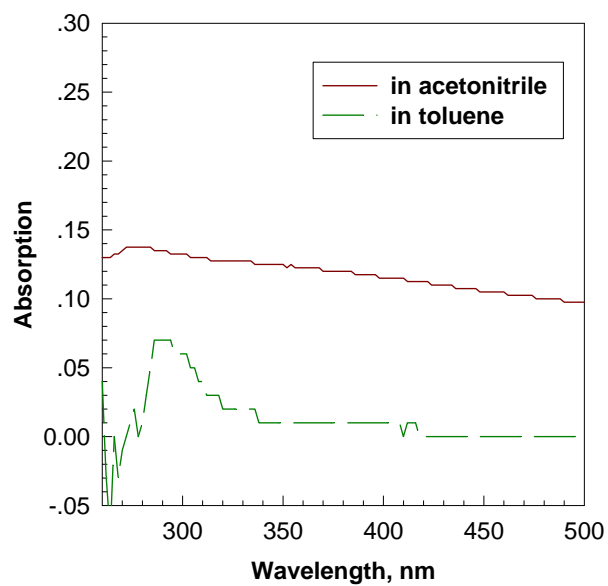

Figure S2. Absorption of PMDI in solvents at saturated concentration.

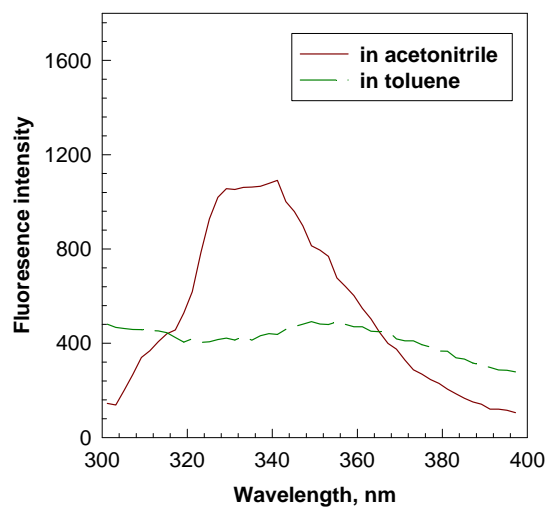

Figure S3. Fluorescence of PMDI in solvents at saturated concentration.

TEM images of the PMDI nanowires

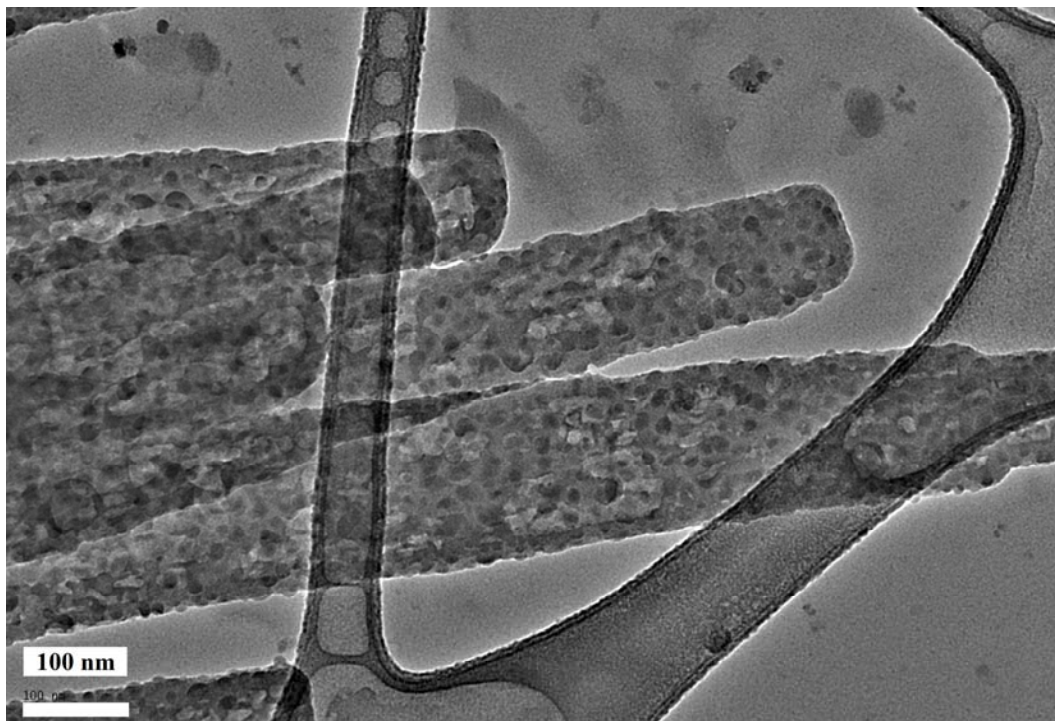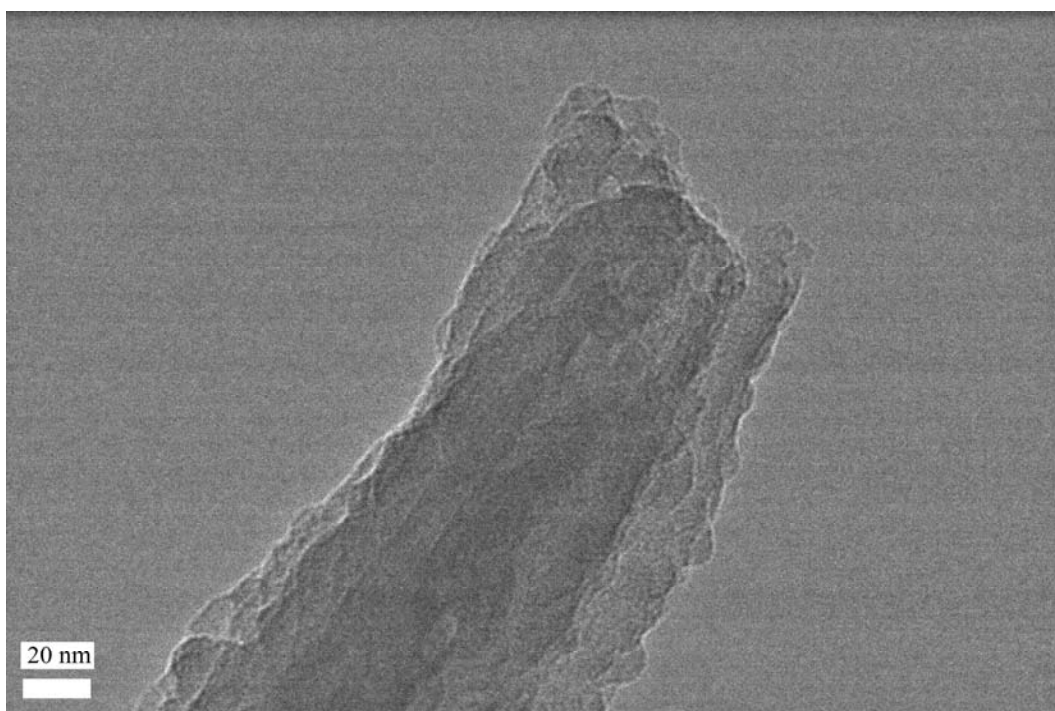

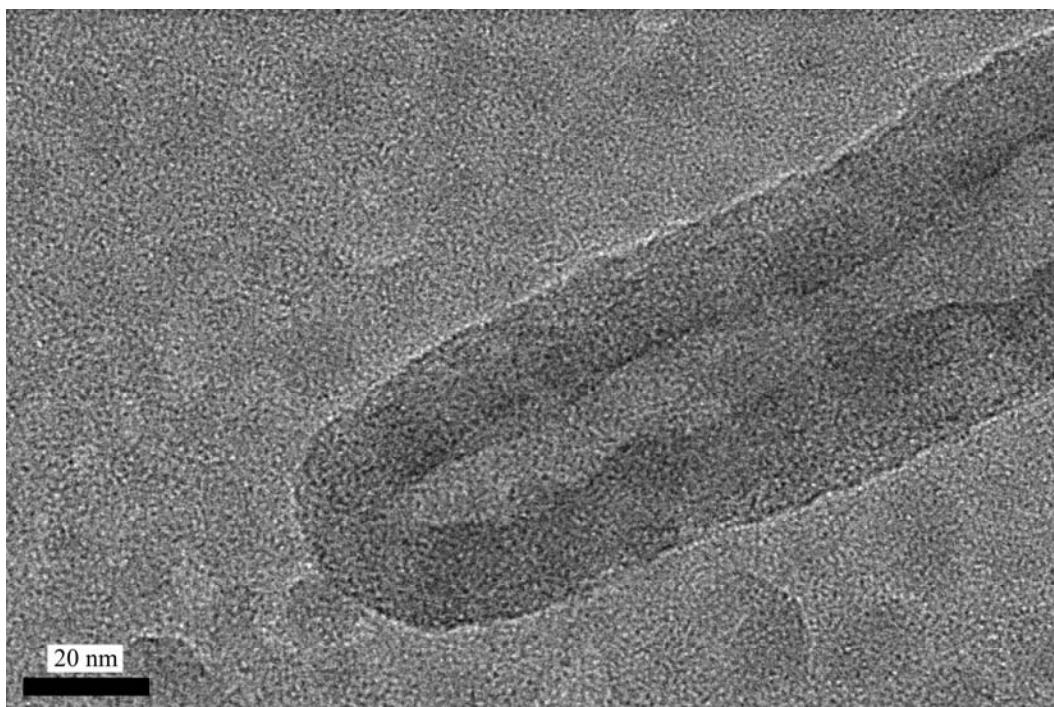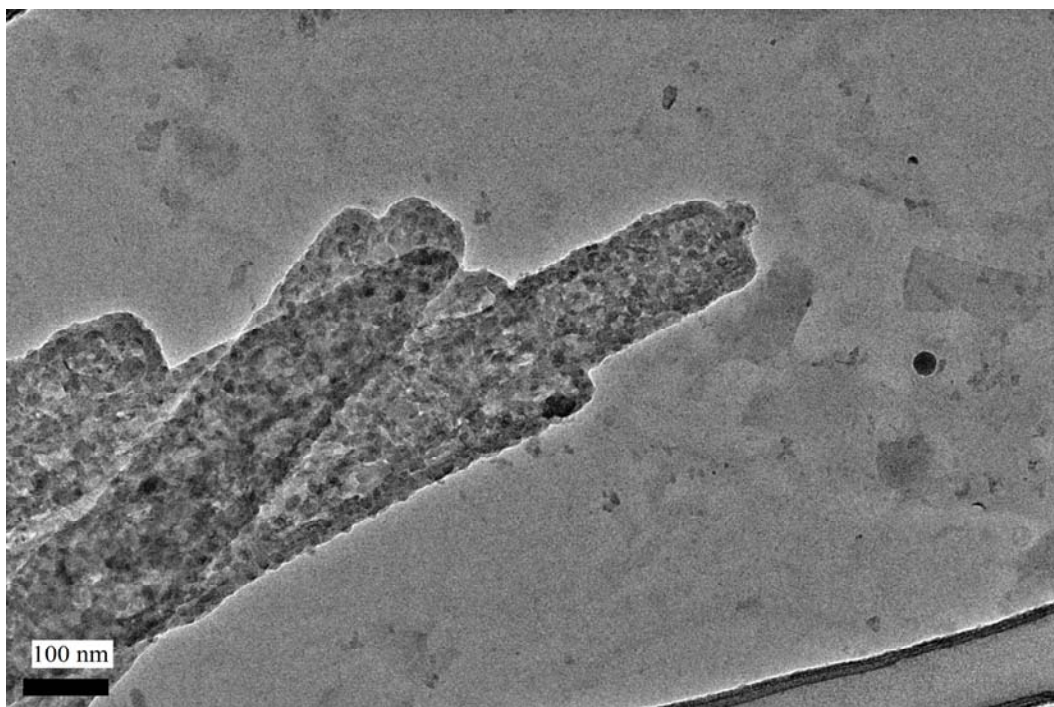

Supplement: b918297g.pdf [file b918297g.pdf]
